# Supplementary material
Source: publisher site journal article supplement (https://www.dovepress.com/article/314621)
Supplement: Supplementary file 1 [file get_supplementary_file.php]

**Table S1. Comparison of baseline characteristics in patients with different response**

|  | SIR (113) | Non-SIR (93) | ***P*** |
| --- | --- | --- | --- |
| Age at diagnosis (years)  Mean ± SD | 43.8±14.1 | 45.1±12.6 | 0.502 |
| Gender, n (%)  Male  Female | 54 (47.8)  59 (52.2) | 41 (44.1)  52 (55.9) | 0.697 |
| Histology, n (%)  Papillary  Follicular | 108 (95.6)  5 (4.4) | 93 (100)  0 | 0.065 |
| Tumor max size (cm)  Median (IQR) | 1.3 (0.8,2.2) | 1.1 (0.7,2.0) | 0.070 |
| ETE, n (%)  Yes  No | 26 (23.0)  87 (77.0) | 28 (30.1)  65 (69.9) | 0.320 |
| LNM, n (%)  N0  N1a  N1b | 15 (13.3)  43 (38.1)  55 (48.6) | 13 (14.0)  45 (48.4)  35 (37.6) | 0257 |
| No. of LNM  Median (IQR) | 6 (2,8) | 5 (1,7) | 0.108 |
| AJCC stage, n (%)  Ⅰ  Ⅱ  Ⅲ | 88 (77.8)  23 (20.4)  2 (1.8) | 74 (79.6)  19 (20.4)  0 | 0.652 |
| TNM stage, n (%)  Tx  T1  T2  T3  T4 | 22 (19.5)  65 (57.5)  19 (16.8)  6 (5.3)  1 (0.9) | 9 (9.7)  67 (72.0)  10 (10.8)  7 (7.5)  0 | 0.088 |
| ATA risk stratification, n (%)  Low  Intermediate  High | 2 (1.8)  54 (47.8)  57 (50.4) | 8 (8.6)  66 (71.0)  19 (20.4) | **<0.001** |
| Surgery-first RAI (months)  Median (IQR) | 2.0 (2.0,2.0) | 2.0 (1.0,3.0) | 0.548 |
| Rx-WBS at first RAI  Thyroid remnant  Lymphatic metastasis  Distant metastasis | 14 (12.4)  79 (70.8)  20 (16.8) | 25 (26.9)  64 (68.8)  4 (4.3) | **0.001** |
| PresTg1 (ng/ml)  Mean ± SD  Median (IQR) | 110.0±160.3  26.5 (4.6,166.5) | 18.5±55.2  3.0 (0.9,11.8) | **<0.001** |
| PresTg2 (ng/ml)  Mean ± SD  Median (IQR) | 101.9±162.3  11.3 (1.6,106.7) | 10.1±28.7  0.5 (0.1,4.3) | **<0.001** |
| TRI (%)  Mean ± SD  Median (IQR) | 7.6±194.7  47.3 (0.0,70.1) | -36.2±762.8  71.6 (33.9,87.3) | **<0.001** |

Abbreviations: ER, Excellent response; Non-ER, Non-excellent response; SD, Standard deviation; IQR, Interquartile range; ETE, Extra-thyroid extension; LNM, Lymph node metastasis; AJCC, American Joint Committee on Cancer; TNM, Tumor Node Metastasis; ATA, American Thyroid Association; Rx-WBS, Post-therapy whole-body scanning; RAI, Radioactive iodine; Surgery-first RAI, Interval from surgery to first RAI treatment; PresTg1, sTg measured after THW and before first RAI therapy; PresTg2, sTg measured after THW and before second RAI therapy; TRI, Thyroglobulin reduction index.
